# Supplementary material for: Extensive theoretical studies on two new members of the FOX-7 family: 5-(dinitromethylene)-1,4-dinitramino-tetrazole and 1,1′-dinitro-4,4′-diamino-5,5′-bitetrazole as energetic compounds
Source: Royal Society of Chemistry journal article supplement (doi:10.1039/c4cp04883k), 2015-01-01
Supplement: c4cp04883k1.pdf [file c4cp04883k1.pdf]

**Extensive Theoretical Studies on Two New members of the FOX-7 family: 5-(dinitromethylene)-1,4-dinitramino-Tetrazole and 1,1'-dinitro-4,4'-diamino-5,5'-Bitetrazole as Energetic Compounds**

Piao He<sup>a</sup>, Jian-Guo Zhang<sup>\*\*a</sup>, Kun Wang<sup>a,b</sup>, Xin Yin<sup>a</sup>, Xin Jin<sup>a</sup>, Tong-Lai Zhang<sup>a</sup>

**Supporting Information**

**SI 1 Table 1** Selected parameters of the optimized geometry for DNAT and DNABT

| DNAT         |       |             |       |                |        | DNABT        |       |             |       |                |        |
|--------------|-------|-------------|-------|----------------|--------|--------------|-------|-------------|-------|----------------|--------|
| Bond lengths | Å     | Bond angles | (°)   | Dihedral angle | (°)    | Bond lengths | Å     | Bond angles | (°)   | Dihedral angle | (°)    |
| N1-N2        | 1.384 | N1-N2-N3    | 108.8 | N1-N2-N3-N4    | 123.1  | N1-N2        | 1.437 | N1-N2-N3    | 108.1 | N1-N2-N3-N4    | 0.947  |
| N2-N3        | 1.245 | N2-N3-N4    | 108.2 | N1-C5-N4-N3    | 0.700  | N2-N3        | 1.251 | N2-N3-N4    | 111.5 | N1-C5-N4-N3    | -1.000 |
| N3-N4        | 1.391 | N3-N4-C5    | 110.8 | N4-N1-C5-C6    | 0.169  | N3-N4        | 1.356 | N3-N4-C5    | 109.7 | N4-N1-C5-C5'   | -167.2 |
| N4-C5        | 1.374 | N4-C5-N1    | 101.3 | C5-C6-N5-N6    | -179.2 | N4-C5        | 1.404 | N4-C5-N1    | 102.9 | N4'-N1'-C5'-C5 | 167.2  |
| C5-N1        | 1.376 | N1-C5-C6    | 131.5 | O1-O2-N5-C6    | -179.9 | C5-N1        | 1.409 | C5-N1-N2    | 107.6 | N2-N1-N5-C5    | -124.8 |
| C5-C6        | 1.381 | C5-C6-N5    | 123.3 | C5-C6-N6-O3    | 137.1  | C5-C5'       | 1.355 | N1-C5-C5'   | 127.7 | C5-N1-N5-O1    | -14.9  |
| C6-N5        | 1.426 | C6-N5-O1    | 116.6 | N2-N1-C5-N7    | -166.7 | N1-N5        | 1.492 | C5-N1-N5    | 118.7 | N2-N1-N5-O2    | 45.1   |
| N1-N7        | 1.357 | O1-N5-O2    | 124.1 | N2-N1-N7-N8    | 95.2   | N5-O1        | 1.213 | N1-N5-O1    | 115.0 | O1-O2-N5-N1    | 174.3  |
| N7-N8        | 1.488 | C5-N1-N7    | 130.6 | N7-N8-O5-O6    | -175.8 | N5-O2        | 1.201 | O1-N5-O2    | 129.3 | N3-N4-N6-C5    | 157.6  |
| N5-O1        | 1.215 | N1-N7-N8    | 112.5 | N3-N4-C5-N9    | -164.5 | N4-N6        | 1.383 | C5-N4-N6    | 125.0 | C5-N4-N6-H2    | 128.5  |
| N8-O5        | 1.205 | N7-N8-O5    | 116.5 | N3-N4-N9-N10   | 63.2   | N6-H1        | 1.016 | N4-N6-H1    | 110.5 | N3-N4-N6-H1    | 48.9   |
| N7-H1        | 1.027 | O5-N8-O6    | 130.2 | N9-N10-O7-O8   | 175.9  | N6-H2        | 1.014 | H1-N6-H2    | 111.1 | H1-H2-N6-N4    | 122.5  |

**SI 2 Table 2** NBO charges of partial atoms for DNAT and DNABT

| DNAT |        |      |        | DNABT |        |      |        |
|------|--------|------|--------|-------|--------|------|--------|
| Atom | Charge | Atom | Charge | Atom  | Charge | Atom | Charge |
| N1   | -0.094 | N10  | 0.616  | N1    | -0.192 | N1'  | -0.192 |
| N2   | 0.050  | O1   | -0.318 | N2    | -0.039 | N2'  | -0.039 |
| N3   | 0.011  | O2   | -0.468 | N3    | 0.009  | N3'  | 0.009  |
| N4   | -0.104 | O3   | -0.312 | N4    | -0.108 | N4'  | -0.108 |
| C5   | 0.421  | O4   | -0.378 | C5    | 0.259  | C5'  | 0.259  |
| C6   | 0.071  | O5   | -0.340 | N5    | 0.619  | N5'  | 0.619  |
| N5   | 0.468  | O6   | -0.316 | N6    | -0.613 | N6'  | -0.613 |
| N6   | 0.477  | O7   | -0.329 | O1    | -0.370 | O1'  | -0.370 |
| N7   | -0.294 | O8   | -0.320 | O2    | -0.311 | O2'  | -0.311 |
| N8   | 0.606  | H1   | 0.434  | H1    | 0.367  | H1'  | 0.367  |
| N9   | -0.296 | H2   | 0.418  | H2    | 0.379  | H2'  | 0.379  |

\* The type of article: Research paper

Corresponding authors: Jian-Guo Zhang, Tel & Fax: +86 10 68918091.

E-mail: zjgbit@bit.edu.cn
